# Supplementary material
Source: MDPI journal article supplement (https://www.mdpi.com/2075-163X/7/7/127)
Supplement: s1 [file s1]

## Sheet: Standards
Obsidian Astimex standard (wt. %)
Oxide	Published value	Average analyses (n=8, 1σ)	M.D.L.
SiO2	73.94	74.00±1.14	0.0055
Al2O3	13.11	13.06±.12	0.0055
TiO2	0.1	0.08±0.02	0.007
FeO	1.72	1.46±0.08	0.0141
CaO	0.76	0.68±0.04	0.0054
MgO	0.07	0.05±0.04	0.005
Na2O	4.06	4.39±0.50	0.0042
K2O	5.04	4.72±0.34	0.0023
MnO	0.06	n.a.
F	0.07	n.a.
Cl	0.36	n.a.
H2O	0.8	-
Total	100.09	98.44±0.55
M.D.L. - minimum detection limit
n.a. - not analized

## Sheet: OpxApp
Great Dyke Pyroxene analyses		Opx 6	23	26	31	32	35	37	38	39	40	41	Opx 42	123	124	125	126	128	129	131	40	21	22	23	24	25	26	28	29	30	33	35	39	41	43	44	45	49	50	51	54	55	56	57	58	60	61	62	63
Comment	M.D.L.	CR01 P6	Webb01a P23	Webb01a P26	Webb01a P31	Webb01a P32	Webb01a P35	Webb01a P37	Webb01a P38	Webb01a P39	Webb01a P40	Webb01a P41	Webb01a P42	Webb01a P123	Webb01a P124	Webb01a P125	Webb01a P126	Webb01a P128	Webb01a P129	Webb01a P131	Webb01 P40	Webb01 P21	Webb01 P22	Webb01 P23	Webb01 P24	Webb01 P25	Webb01 P26	Webb01 P28	Webb01 P29	Webb01 P30	Webb01 P33	Webb01 P35	Webb01 P39	Webb01 P41	Webb01 P43	Webb01 P44	Webb01 P45	Webb01 P49	Webb01 P50	Webb01 P51	Webb01 P54	Webb01 P55	Webb01 P56	Webb01 P57	Webb01 P58	Webb01 P60	Webb01 P61	Webb01 P62	Webb01 P63
Depth		0	-0.2	-0.2	-0.2	-0.2	-0.2	-0.2	-0.2	-0.2	-0.2	-0.2	-0.2	-0.2	-0.2	-0.2	-0.2	-0.2	-0.2	-0.2	-5.8	-5.8	-5.8	-5.8	-5.8	-5.8	-5.8	-5.8	-5.8	-5.8	-5.8	-5.8	-5.8	-5.8	-5.8	-5.8	-5.8	-5.8	-5.8	-5.8	-5.8	-5.8	-5.8	-5.8	-5.8	-5.8	-5.8	-5.8	-5.8
SiO2	0.0055	55.712	54.115	54.464	53.491	53.619	53.93	54.29	53.685	53.7	54.262	53.745	53.997	53.7	54.001	54.33	53.52	53.549	54.657	54.813	53.535	54.821	53.835	54.136	54.861	57.371	55.713	53.652	54.127	54.083	54.041	53.992	55.562	54.548	53.915	55.913	55.518	54.407	54.139	53.998	53.938	54.349	57.483	54.429	54.861	53.779	54.433	53.537	54.302
TiO2	0.007	0.1	0.176	0.146	0.156	0.178	0.17	0.154	0.115	0.179	0.181	0.074	0.097	0.138	0.11	0.148	0.143	0.105	0.17	0.194	0.162	0.125	0.147	0.099	0.148	0.178	0.151	0.17	0.17	0.098	0.195	0.173	0.099	0.15	0.138	0.12	0.165	0.161	0.115	0.123	0.11	0.18	0.069	0.175	0.173	0.123	0.183	0.228	0.18
Al2O3	0.0055	1.306	1.204	1.304	1.328	1.302	1.323	2.011	1.322	1.317	1.224	1.359	1.286	1.587	1.31	1.305	1.363	1.302	1.339	1.261	1.363	1.323	1.44	1.365	1.388	1.471	1.343	1.444	1.35	1.415	1.229	1.292	1.298	1.339	1.405	1.443	1.539	1.233	1.305	1.379	1.303	1.326	1.345	1.166	1.15	1.265	1.232	1.197	1.174
Cr2O3	0.0086	0.495	0.313	0.295	0.32	0.307	0.424	0.23	0.249	0.275	0.333	0.302	0.237	0.325	0.224	0.346	0.276	0.186	0.327	0.302	0.29	0.379	0.419	0.328	0.283	0.303	0.443	0.379	0.276	0.417	0.398	0.347	0.302	0.309	0.362	0.45	0.334	0.321	0.295	0.269	0.34	0.296	0.392	0.334	0.347	0.474	0.34	0.36	0.309
FeO	0.0141	8.371	13.596	13.022	12.889	12.654	12.014	12.972	13.048	13.045	13.182	12.837	12.899	13.845	12.74	12.524	12.307	12.755	12.174	11.845	11.934	12.37	11.682	12.417	12.196	11.737	12.124	12.339	12.373	12.355	12.74	12.581	12.029	12.234	11.537	12.672	11.9	12.807	12.75	12.778	12.813	11.821	12.451	12.277	12.528	12.794	12.766	12.551	12.306
MnO	0.0119	0.238	0.275	0.284	0.275	0.325	0.289	0.302	0.284	0.229	0.243	0.22	0.252	0.229	0.38	0.197	0.238	0.206	0.28	0.284	0.216	0.202	0.225	0.243	0.234	0.248	0.216	0.22	0.239	0.248	0.275	0.294	0.266	0.234	0.258	0.266	0.239	0.211	0.257	0.252	0.225	0.244	0.22	0.243	0.266	0.298	0.23	0.298	0.239
MgO	0.005	31.358	27.247	27.337	28.297	28.218	27.385	27.8	28.084	27.909	28.778	28.029	28.329	27.418	28.587	27.979	28.109	28.266	27.293	27.252	28.053	28.074	27.695	28.515	28.92	27.683	28.659	27.873	28.23	28.238	28.468	28.359	28.701	28.275	27.596	27.1	27.432	28.839	28.67	28.826	28.667	27.605	27.811	28.857	28.638	28.699	28.97	30.965	28.652
CaO	0.0054	0.692	1.351	1.671	1.528	1.245	2.728	1.178	1.414	1.636	1.302	2.573	1.407	1.254	1.929	2.418	1.933	1.485	2.584	2.962	2.227	1.796	3.616	1.955	1.931	1.793	1.428	2.078	2.35	1.495	1.461	1.573	1.905	1.837	3.382	1.618	1.419	1.358	1.448	1.751	1.378	2.956	1.874	1.345	1.511	1.338	1.213	1.541	2.033
Na2O	0.0042	0.034	0.048	bdl	0.019	0.022	0.01	bdl	bdl	0.035	bdl	0.015	bdl	bdl	bdl	0.036	bdl	0.015	0.064	0.068	0.023	0.038	0.055	0.019	0.041	0.048	0.026	0.023	0.035	0.026	bdl	0.009	0.041	0.022	0.077	0.032	0.039	0.016	0.042	bdl	0.006	0.041	0.028	bdl	0.013	0.009	0.01	0.016	0.02
Total		98.353	98.325	98.537	98.309	97.878	98.282	98.982	98.204	98.333	99.516	99.167	98.531	98.559	99.291	99.283	97.896	97.883	98.902	98.984	97.825	99.129	99.114	99.089	100.004	100.841	100.129	98.182	99.152	98.379	98.811	98.624	100.204	98.948	98.694	99.622	98.59	99.353	99.032	99.395	98.789	98.845	101.673	98.831	99.487	98.827	99.377	100.71	99.217
		Cations based on 6 oxygens
Si		1.98132	1.97363	1.98019	1.9399	1.95279	1.96089	1.96051	1.95111	1.95035	1.94435	1.93443	1.95428	1.95413	1.93788	1.95319	1.94758	1.94885	1.97639	1.97949	1.94838	1.97305	1.93648	1.94543	1.95077	2.03467	1.98292	1.94904	1.94555	1.95873	1.95019	1.95148	1.97384	1.96437	1.94745	2.01347	2.01216	1.95003	1.94657	1.93408	1.9445	1.96254	2.02493	1.95908	1.96529	1.93932	1.9498	1.87856	1.94824
Ti		0.0026744	0.00482704	0.00399181	0.00425446	0.00487503	0.00464829	0.00418206	0.00314302	0.00488892	0.00487729	0.00200294	0.00264003	0.00377642	0.00296851	0.00400118	0.00391324	0.00287367	0.00462272	0.00526856	0.00443375	0.00338316	0.00397637	0.00267538	0.00395754	0.00474726	0.00404153	0.00464413	0.00459513	0.00266908	0.00529187	0.0047022	0.00264478	0.00406216	0.0037485	0.00324964	0.00449712	0.00433944	0.00310941	0.00331301	0.00298213	0.00488788	0.00182785	0.00473675	0.00466048	0.00333551	0.00492947	0.00601625	0.00485646
Al		0.0547399	0.0517523	0.0558766	0.0567613	0.055886	0.0566943	0.0855887	0.056626	0.0563742	0.0516912	0.0576489	0.0548546	0.0680633	0.0554054	0.0552932	0.0584563	0.0558462	0.0570642	0.0536711	0.0584638	0.0561186	0.0610474	0.057812	0.0581686	0.0614853	0.0563352	0.061824	0.0571896	0.0603986	0.0522711	0.0550368	0.0543455	0.0568304	0.0598121	0.0612428	0.0657391	0.0520842	0.0553001	0.0582126	0.0553622	0.0564321	0.0558404	0.0494625	0.0485531	0.0537629	0.052011	0.0495017	0.0496421
Cr		0.0139183	0.00902541	0.00847997	0.00917538	0.00883996	0.0121889	0.00656677	0.0071549	0.00789672	0.00943407	0.00859406	0.00678172	0.00935059	0.00635548	0.00983461	0.0079408	0.00535199	0.00934869	0.00862288	0.00834467	0.0107847	0.0119162	0.0093192	0.00795619	0.00849612	0.012466	0.0108855	0.00784354	0.0119406	0.0113557	0.00991607	0.00848234	0.00879789	0.0103381	0.0128121	0.00957087	0.00909636	0.00838604	0.00761772	0.00969098	0.00845073	0.0109177	0.00950481	0.00982807	0.0135142	0.00962904	0.0099873	0.00876517
Fe3		0	0	0	0.0470893	0.0215014	0.000736161	0	0.0277128	0.0277113	0.0404126	0.0619304	0.0248132	0.00676439	0.0565437	0.0229928	0.0306092	0.0364119	0	0	0.029188	0	0.0499538	0.0379828	0.0272386	0	0	0.0215451	0.0371219	0.00668018	0.0254044	0.0233143	0	0	0.0328413	0	0	0.0311865	0.0398855	0.0593791	0.040398	0.00312956	0	0.0134013	0.0026154	0.0480417	0.0295894	0.172454	0.0367932
Fe2		0.248965	0.414681	0.395941	0.343818	0.363906	0.364579	0.391752	0.368865	0.368511	0.354605	0.324468	0.365603	0.414572	0.325797	0.353541	0.343922	0.351795	0.368143	0.357734	0.334039	0.372321	0.301463	0.335183	0.335436	0.348109	0.360869	0.353316	0.334806	0.367528	0.359081	0.356968	0.357371	0.368442	0.315661	0.381623	0.360689	0.352689	0.343491	0.323372	0.345898	0.353845	0.366801	0.356146	0.372704	0.337791	0.35283	0.195848	0.332439
Mn		0.00716916	0.00849505	0.00874582	0.00844729	0.0100255	0.00890036	0.00923722	0.00874244	0.00704466	0.00737516	0.00670694	0.00772507	0.00705832	0.0115503	0.0059987	0.00733572	0.00635009	0.00857574	0.00868708	0.00665848	0.00615784	0.00685515	0.00739642	0.00704766	0.00744972	0.0065116	0.00676929	0.00727631	0.00760768	0.00840567	0.00900052	0.00800388	0.0071375	0.00789337	0.00811335	0.00733691	0.00640553	0.00782669	0.00764511	0.0068704	0.00746282	0.00656415	0.00740822	0.00807107	0.00910204	0.00697818	0.00885671	0.0072629
Mg		1.6625	1.48141	1.48169	1.52985	1.53204	1.48438	1.49659	1.52159	1.51109	1.53726	1.50394	1.52847	1.48739	1.52933	1.4995	1.52487	1.53356	1.47125	1.46716	1.52203	1.50628	1.48511	1.52761	1.53303	1.46361	1.52061	1.50948	1.51268	1.5246	1.53151	1.52804	1.51998	1.51794	1.48598	1.45483	1.48216	1.54091	1.53672	1.53918	1.54065	1.48602	1.46048	1.54839	1.52938	1.54281	1.54698	1.61976	1.53246
Ca		0.0263675	0.052791	0.0650925	0.0593717	0.0485807	0.106274	0.0455776	0.05506	0.0636619	0.049986	0.0992232	0.0545592	0.0488917	0.0741677	0.0931364	0.075365	0.0579044	0.10011	0.114607	0.0868388	0.0692557	0.139359	0.0752721	0.073567	0.0681303	0.0544545	0.0808794	0.090501	0.0580114	0.0564888	0.0609145	0.072508	0.070878	0.130885	0.0624265	0.0551023	0.0521488	0.0557809	0.0671956	0.0532256	0.114364	0.070729	0.0518682	0.0579943	0.0516952	0.0465529	0.0579336	0.0781486
Na		0.0023444	0.00339418	0	0.00133598	0.00155348	0.00070497	0	0	0.00246464	0	0.00104678	0.000280687	0	0	0.00250931	0	0.00105844	0.00448698	0.0047613	0.00162297	0.00265169	0.00383582	0.00132382	0.00282666	0.00330058	0.00179419	0.00161998	0.00243917	0.00182572	0	0.000630702	0.002824	0.00153608	0.00539256	0.00223424	0.00274057	0.00111187	0.0029279	0	0.000419384	0.0028705	0.00191238	0	0.000902929	0.000629254	0.000694505	0.00108852	0.00139124
		4	4	4	4	4	4	4	4	4	4	4	4	4	4	4	4	4	4	4	4	4	4	4	4	4	4	4	4	4	4	4	4	4	4	4	4	4	4	4	4	4	4	4	4	4	4	4	4
En		85.7917	76.0133	76.2687	77.2601	77.9257	75.8898	77.3863	77.1117	76.6672	77.5508	75.5916	77.4518	75.9796	77.0118	76.1488	77.2178	77.4653	75.8571	75.6462	77.1783	77.3301	75.1618	77.3063	77.8476	77.8578	78.5466	76.8097	76.5872	77.9122	77.6437	77.5955	77.9534	77.5544	75.6082	76.6151	78.0927	77.9444	77.7741	77.3797	77.8039	75.9196	76.948	78.6063	77.9225	77.9064	78.2904	79.1673	77.4032
Fs		12.8476	21.2779	20.3808	19.7416	19.6033	18.6769	20.2569	20.098	20.1028	19.9276	19.4212	19.7835	21.5229	19.2533	19.1215	18.9658	19.6097	18.9813	18.4447	18.4183	19.1144	17.7853	18.8845	18.4167	18.518	18.6406	19.0748	18.8308	19.1232	19.4924	19.3112	18.328	18.8243	17.7322	20.0973	19.0041	19.4178	19.4028	19.2421	19.5082	18.2376	19.3256	18.7606	19.1227	19.4832	19.3536	18.0012	18.6496
Wo		1.36067	2.70879	3.35059	2.99838	2.471	5.4333	2.35675	2.79036	3.22997	2.52165	4.98718	2.76467	2.49751	3.73483	4.72973	3.81639	2.92495	5.16163	5.90912	4.40337	3.55549	7.05299	3.80923	3.73575	3.62425	2.81283	4.11554	4.58207	2.96457	2.86384	3.09331	3.71862	3.62128	6.65956	3.28755	2.90325	2.63787	2.82309	3.37814	2.68793	5.84278	3.72648	2.63316	2.95484	2.61043	2.35597	2.83156	3.94721
Mg#		86.9752	78.1296	78.9127	81.65	80.8061	80.2819	79.2541	80.488	80.3942	81.2564	82.2541	80.6975	78.2029	82.4381	80.921	81.5966	81.3406	79.9856	80.3969	82.0029	80.1809	83.1262	82.0064	82.0475	80.7857	80.8199	81.033	81.8778	80.576	81.0069	81.0628	80.9641	80.4684	82.4792	79.2195	80.4277	81.3746	81.7313	82.6383	81.665	80.7678	79.9264	81.3002	80.4055	82.0381	81.4282	89.2131	82.1739
M.D.L. - minimum detection limit
bdl - below detection limit
[truncated: 372 more columns]

## Sheet: CpxApp
Great Dyke Pyroxene analyses		Cpx 7	10	11	15	Cpx 23	24	4	5	7	9	10	11	12	13	14	26	27	28	29	30	31	32	33	34	39	40	41	42	43	44	45	46	47	48	49	50	51	52	53	54	55	56	58	59	62	63	64	66
Comment	M.D.L.	GA02 P7	GA02 P10	GA02 P11	GA02 P15	CR01 P23	CR01 P24	CR01 P4	CR01 P5	CR01 P7	CR01 P9	CR01 P10	CR01 P11	CR01 P12	CR01 P13	CR01 P14	CR01 P26	CR01 P27	CR01 P28	CR01 P29	CR01 P30	CR01 P31	CR01 P32	CR01 P33	CR01 P34	CR01 P39	CR01 P40	CR01 P41	CR01 P42	CR01 P43	CR01 P44	CR01 P45	CR01 P46	CR01 P47	CR01 P48	CR01 P49	CR01 P50	CR01 P51	CR01 P52	CR01 P53	CR01 P54	CR01 P55	CR01 P56	CR01 P58	CR01 P59	CR01 P62	CR01 P63	CR01 P64	CR01 P66
Depth		0.2	0.2	0.2	0.2	0	0	0	0	0	0	0	0	0	0	0	0	0	0	0	0	0	0	0	0	0	0	0	0	0	0	0	0	0	0	0	0	0	0	0	0	0	0	0	0	0	0	0	0
SiO2	0.0055	50.877	54.33	52.569	53.313	49.021	51.795	52.691	52.446	51.782	52.508	52.029	52.616	51.349	52.33	52.325	51.657	56.188	51.927	51.903	56.041	42.969	56.042	51.261	51.724	53.006	55.516	54.616	51.998	51.819	50.624	51.402	52.053	51.699	51.953	50.314	51.89	52.099	51.799	51.716	53.482	52.275	50.989	52.109	50.097	53.295	54.477	51.543	52.98
TiO2	0.007	0.491	0.455	0.265	0.297	0.208	0.236	0.254	0.252	0.24	0.182	0.272	0.226	0.279	0.253	0.253	0.247	0.207	0.199	0.235	0.325	0.234	0.287	0.29	0.274	0.19	0.264	0.312	0.178	0.256	0.271	0.305	0.306	0.22	0.212	0.217	0.189	0.237	0.271	0.2	0.161	0.238	0.228	0.237	0.161	0.051	0.253	0.21	0.216
Al2O3	0.0055	1.406	1.603	0.837	0.522	3.101	2.639	2.398	2.533	2.424	2.548	2.591	2.479	2.858	2.35	2.337	2.545	2.707	2.736	2.608	2.398	3.65	2.707	2.738	2.54	2.379	3.532	2.834	2.378	2.441	7.283	2.584	2.437	2.517	2.562	2.524	2.199	1.943	2.045	2.152	1.047	2.198	2.433	2.304	2.565	1.085	2.194	2.525	1.408
Cr2O3	0.0086	0.144	0.302	0.251	0.026	0.993	1.171	0.924	1.245	1.027	0.869	1.202	1.553	1.275	1.006	0.921	1.047	1.305	1.258	1.171	1.114	1.234	1.061	0.978	1.161	0.933	0.971	0.993	0.912	0.921	1.045	0.996	1.151	1.009	1.041	0.935	1.311	1.133	1.322	0.901	0.568	1.092	0.896	0.988	1.028	0.423	0.988	1.185	0.792
FeO	0.0141	4.724	5.052	3.127	3.684	4.242	4.337	3.679	4.098	4.071	4.26	4.804	4	4.459	4.375	4.609	4.071	3.747	4.034	4.183	3.815	4.285	3.932	4.837	4.546	4.982	4.868	4.65	5.032	6.515	4.568	3.748	4.374	3.549	3.939	4.224	3.828	3.723	3.909	4.086	2.695	4.088	3.995	4.001	3.717	3.436	4.125	4.235	3.764
MnO	0.0119	0.197	0.206	0.131	0.169	0.089	0.136	0.118	0.122	0.155	0.113	0.197	0.094	0.145	0.075	0.127	0.131	0.197	0.103	0.136	0.089	0.183	0.108	0.15	0.168	0.197	0.131	0.16	0.141	0.178	0.113	0.122	0.15	0.07	0.141	0.141	0.099	0.202	0.145	0.084	0.019	0.174	0.075	0.113	0.16	0.165	0.155	0.042	0.132
MgO	0.005	15.707	15.847	16.67	11.441	17.073	16.18	16.62	16.182	15.989	15.814	16.856	14.109	14.625	16.703	16.245	15.92	13.865	16.072	16.331	13.47	17.386	13.592	17.061	16.268	15.987	13.844	15.231	16.274	17.784	13.059	16.216	16.751	15.71	15.783	17.285	16.229	16.767	16.553	16.317	16.939	16.231	16.254	16.176	18.631	16.865	16.406	16.588	16.186
CaO	0.0054	22.768	22.128	23.436	23.111	19.764	22.108	22.188	22.439	22.753	22.358	21.099	20.421	20.61	21.118	21.954	22.811	22.797	22.276	21.899	22.951	20.379	22.895	19.343	21.77	21.762	20.35	22.132	21.555	18.304	21.628	21.654	21.076	22.777	22.765	20.888	22.337	22.563	22.749	22.563	23.926	22.175	23.001	22.546	21.987	23.615	22.25	22.098	24.004
Na2O	0.0042	0.255	0.199	0.115	0.123	0.237	0.286	0.243	0.241	0.294	0.319	0.252	0.352	0.347	0.241	0.234	0.25	0.375	0.21	0.257	0.314	0.172	0.323	0.241	0.25	0.295	0.442	0.341	0.272	0.232	0.343	0.259	0.264	0.255	0.265	0.216	0.279	0.305	0.185	0.247	0.137	0.262	0.267	0.275	0.206	0.167	0.358	0.24	0.141
Total		96.575	100.16	97.421	92.698	94.735	98.9	99.135	99.565	98.754	99.04	99.346	95.866	95.954	98.5	99.015	98.682	101.405	98.855	98.723	100.517	90.499	100.95	96.92	98.733	99.736	99.961	101.269	98.741	98.454	98.971	97.286	98.565	97.819	98.711	96.808	98.37	98.972	99.001	98.282	99.006	98.771	98.147	98.749	98.634	99.114	101.219	98.692	99.664
		Cations based on 6 oxygens
Si		1.93011	1.99527	1.96772	2.14427	1.87951	1.91633	1.9401	1.92873	1.91872	1.9422	1.91557	2.02456	1.96845	1.94172	1.93523	1.916	2.04902	1.9234	1.92234	2.06531	1.71452	2.05497	1.92934	1.91843	1.94974	2.05376	1.9846	1.92825	1.92299	1.8844	1.92916	1.92941	1.93315	1.92772	1.89134	1.92878	1.92054	1.91389	1.92286	1.96791	1.93724	1.89668	1.92944	1.83793	1.9607	1.97013	1.90792	1.94764
Ti		0.0140076	0.0125659	0.00745933	0.00898306	0.00599719	0.00656623	0.00703303	0.00696916	0.00668753	0.00506245	0.0075308	0.00653947	0.00804298	0.00705956	0.00703661	0.00688946	0.00567666	0.00554306	0.00654526	0.00900708	0.00702141	0.00791399	0.00820804	0.0076423	0.00525566	0.00734441	0.00852567	0.00496384	0.00714411	0.00758591	0.00860815	0.00852943	0.00618623	0.00591549	0.00613424	0.005283	0.00656998	0.00752985	0.00559209	0.00445496	0.00663264	0.00637784	0.00659914	0.00444186	0.00141096	0.00688056	0.00584562	0.00597132
Al		0.062864	0.0693826	0.0369245	0.0247442	0.140127	0.115074	0.104062	0.109787	0.105858	0.111077	0.112428	0.112421	0.129125	0.102769	0.101868	0.111253	0.116344	0.119439	0.113842	0.104156	0.171647	0.116987	0.121453	0.111031	0.103134	0.153996	0.121369	0.103931	0.106761	0.319509	0.114298	0.106461	0.110923	0.112039	0.111821	0.0963339	0.0844157	0.0890523	0.0943021	0.0454046	0.0960003	0.106664	0.100544	0.110908	0.0470445	0.0935136	0.110156	0.0610035
Cr		0.00431916	0.00876887	0.00742818	0.000826791	0.0301015	0.0342544	0.0268989	0.0361996	0.0300871	0.0254134	0.034989	0.0472455	0.0386436	0.0295128	0.0269313	0.0307036	0.037626	0.036841	0.0342902	0.0324594	0.0389295	0.0307598	0.0291028	0.0340456	0.0271337	0.0284006	0.0285284	0.0267391	0.0270223	0.0307546	0.0295545	0.033731	0.0298297	0.0305394	0.0277886	0.038528	0.0330217	0.0386192	0.0264864	0.0165242	0.0319954	0.0263513	0.0289235	0.0298186	0.0123038	0.0282498	0.0346804	0.0230195
Fe3		0.0633338	0	0.0136392	0	0.076366	0.0253851	0	0	0.0343524	0	0.024377	0	0	0	0.00345565	0.030235	0	0.000921465	0.0125482	0	0	0	0	0.0207656	0	0	0	0.0224551	0.0226446	0	0	0.00290922	0	0.00920972	0.0811906	0.0171246	0.0501352	0.0427369	0.0401084	0.00311907	0.0030872	0.0801192	0.0182005	0	0.0283516	0	0.0448592	0.0188091
Fe2		0.0865404	0.15516	0.084246	0.123915	0.0596501	0.108808	0.113285	0.126034	0.0917987	0.131775	0.123537	0.128715	0.14295	0.13576	0.1391	0.096042	0.114272	0.124038	0.117015	0.117579	0.142986	0.120576	0.152248	0.120241	0.153254	0.150605	0.141307	0.133598	0.179545	0.1422	0.117637	0.132676	0.11098	0.11302	0.0515978	0.10187	0.0646389	0.0780494	0.0869425	0.079811	0.123607	0.044158	0.105691	0.114043	0.0773624	0.124756	0.0862399	0.0969092
Mn		0.00633014	0.00640788	0.00415327	0.00575731	0.00289028	0.00426195	0.00368007	0.00380019	0.00486465	0.00354024	0.00614333	0.00306356	0.0047081	0.00235713	0.00397843	0.00411552	0.0060849	0.00323146	0.00426641	0.00277815	0.00618479	0.0033543	0.00478187	0.00527774	0.00613768	0.00410478	0.00492446	0.00442876	0.00559491	0.00356272	0.00387824	0.00470928	0.002217	0.00443138	0.00448936	0.00311687	0.00630713	0.00453785	0.00264538	0.000592156	0.00546165	0.00236301	0.00354391	0.00497192	0.00514154	0.00474788	0.00131682	0.00411013
Mg		0.888306	0.867594	0.930202	0.685993	0.975848	0.892423	0.912278	0.887156	0.883209	0.872004	0.925156	0.809316	0.835789	0.923931	0.895675	0.880276	0.753755	0.887471	0.901695	0.740041	1.03418	0.742993	0.957269	0.899489	0.876654	0.763489	0.825069	0.899663	0.983843	0.724663	0.90728	0.925608	0.875724	0.873036	0.96863	0.899288	0.921422	0.911762	0.904424	0.929166	0.896691	0.901337	0.89289	1.01897	0.92495	0.884492	0.915362	0.887042
Ca		0.92543	0.870685	0.939884	0.995917	0.811888	0.876376	0.875314	0.884139	0.903296	0.886051	0.832283	0.841876	0.846502	0.839551	0.869949	0.906503	0.890711	0.884037	0.869001	0.906231	0.871221	0.899479	0.780014	0.865105	0.857648	0.806593	0.861651	0.856412	0.727765	0.862565	0.870733	0.836997	0.912508	0.905022	0.841268	0.889572	0.891147	0.900567	0.89883	0.943246	0.880461	0.91669	0.894428	0.864255	0.930827	0.862125	0.876397	0.945448
Na		0.0187563	0.0141697	0.00834599	0.00959177	0.0176181	0.0205162	0.0173477	0.017184	0.0211217	0.0228774	0.0179887	0.0262605	0.025791	0.0173381	0.0167797	0.0179785	0.0265143	0.0150814	0.0184552	0.0224366	0.0133065	0.0229637	0.0175867	0.0179779	0.0210388	0.0317031	0.0240245	0.0195566	0.0166925	0.0247548	0.0188467	0.0189727	0.0184871	0.0190646	0.0157428	0.0201071	0.0217992	0.013253	0.017806	0.00977383	0.0188251	0.0192565	0.0197423	0.0146532	0.0119121	0.0251022	0.0172246	0.0100499
Total		4	4	4	4	4	4	4	4	4	4	4	4	4	4	4	4	4	4	4	4	4	4	4	4	4	4	4	4	4	4	4	4	4	4	4	4	4	4	4	4	4	4	4	4	4	4	4	4
En		45.2384	45.8211	47.2671	37.9878	50.7263	46.8958	47.9925	46.7582	46.1771	46.1419	48.5556	45.4696	45.7906	48.6474	46.9387	46.0141	42.8577	46.796	47.4512	41.956	50.4875	42.1425	50.6617	47.2024	46.4439	44.3712	45.1344	47.0503	51.4079	41.9019	47.8612	48.7627	46.1099	45.9423	49.8603	47.1361	47.8079	47.1654	46.8539	47.5194	47.0989	46.4055	46.7186	51.0183	47.1555	47.2643	47.6042	45.5312
Fs		7.63258	8.19462	4.97391	6.86194	7.07036	7.05167	5.95963	6.6427	6.59559	6.97286	7.7631	7.23156	7.83187	7.1481	7.47078	6.6008	6.49741	6.58904	6.81819	6.66605	6.98044	6.83909	8.05747	7.39957	8.11919	8.7526	7.73	8.16125	10.5648	8.22238	6.20564	7.14287	5.84347	6.43216	6.83529	6.23708	5.95504	6.24827	6.5819	4.2412	6.65463	6.39844	6.48238	5.70992	5.38947	6.66657	6.81793	5.93973
Wo		47.129	45.9843	47.759	55.1503	42.2034	46.0526	46.0479	46.5991	47.2273	46.8852	43.6813	47.2989	46.3775	44.2045	45.5905	47.3851	50.6449	46.6149	45.7307	51.378	42.532	51.0184	41.2808	45.3981	45.437	46.8762	47.1356	44.7884	38.0273	49.8757	45.9332	44.0945	48.0467	47.6255	43.3044	46.6268	46.2371	46.5863	46.5642	48.2394	46.2464	47.196	46.799	43.2718	47.4551	46.0691	45.5778	48.5291
Mg#		91.1227	84.8292	91.6954	84.7001	94.2395	89.1326	88.9538	87.5607	90.5848	86.8721	88.2199	86.2782	85.3944	87.1888	86.5575	90.1628	86.8354	87.7374	88.5134	86.2901	87.8533	86.0374	86.278	88.2086	85.1196	83.5241	85.3777	87.0702	84.5671	83.596	88.5223	87.4631	88.7525	88.5382	94.9425	89.8248	93.4447	92.1147	91.23	92.0899	87.8852	95.3296	89.4158	89.9346	92.2816	87.6387	91.3898	90.151
M.D.L. - minimum detection limit
bdl - below detection limit
[truncated: 244 more columns]

## Sheet: FspApp
Great Dyke feldspar analyses
Comment	M.D.L.	GA02 P1	GA02 P2	GA02 P3	GA02 P4	GA02 P5	GA02 P6	GA02 P8	GA02 P12	GA02 P13	GA02 P14	GA02 P16	GA02 P17	GA02 P18	GA02 P19	GA02 P20	GA02 P23	GA02 P24	GA02 P26	GA02 P27	CR01 P2	CR01 P3	CR01 P8	CR01 P15	CR01 P16	CR01 P20	CR01 P21	CR01 P22	CR01 P25	Webb01a P93	Webb01a P109	Webb01a P110	Webb01a P133	Webb01a P117	Webb02 P131	Webb02 P132	Webb02 P135	Webb02 P123	Webb02 P121	Webb02 P127	Webb02 P128	Webb02 P122	PXHFW01 P11	PXHFW01 P13	PXHFW01 P15	PXHFW01 P16	PXHFW01 P17	PXHFW01 P18	PXHFW01 P19
SiO2	0.0055	44.558	44.225	44.971	45.768	44.524	45.435	48.228	44.053	44.709	45.307	44.427	43.764	45.07	44.596	44.869	44.609	44.206	44.948	45.65	50.313	47.669	47.033	49.462	46.649	48.769	48.272	44.894	47.233	50.067	51.471	53.405	51.268	51.433	50.378	50.186	50.297	51.195	51.174	50.358	50.344	50.139	50.771	51.052	50.971	50.185	49.957	49.085	51.578
TiO2	0.007	0.033	bdl	bdl	0.028	bdl	bdl	0.036	0.03	0.051	0.013	bdl	0.04	bdl	bdl	0.036	bdl	0.012	0.018	0.01	bdl	0.053	bdl	0.066	bdl	0.023	0.018	bdl	0.055	0.008	0.032	0.031	0.018	0.068	bdl	0.015	0.049	0.089	bdl	0.065	0.049	bdl	0.071	0.023	bdl	0.096	0.061	bdl	0.069
Al2O3	0.0055	32.252	33.522	34.137	32.497	31.892	32.186	31.701	32.259	32.424	32.825	32.268	32.352	35.795	32.155	33.001	32.093	32.309	32.07	32.53	30.37	31.919	30.343	30.865	33.171	30.956	31.327	33.667	31.849	28.73	29.046	28.26	27.104	28.802	30.381	30.462	30.49	29.335	30.195	30.735	30.182	30.479	29.07	29.183	28.874	29.596	29.696	29.63	25.274
Cr2O3	0.0086	bdl	bdl	bdl	bdl	0.02	bdl	bdl	0.026	bdl	bdl	bdl	bdl	bdl	bdl	bdl	0.04	0.02	bdl	0.026	0.04	bdl	bdl	0.046	0.02	0.106	0.159	0.04	0.066	0.027	0.027	0.027	bdl	bdl	bdl	bdl	bdl	bdl	bdl	bdl	bdl	bdl	0.033	0.033	0.026	0.033	0.026	bdl	0.013
FeO	0.0141	0.366	0.399	0.522	0.403	0.468	0.341	0.251	0.399	0.436	0.403	0.461	0.333	0.387	0.379	0.362	0.394	0.399	0.391	0.366	0.338	0.355	1.211	0.322	0.449	0.404	0.28	0.26	0.21	0.243	0.554	0.373	0.353	0.283	0.272	0.288	0.325	0.304	0.402	0.26	0.365	0.422	0.186	0.165	0.14	0.132	0.132	0.169	1.562
MnO	0.0119	bdl	bdl	bdl	bdl	0.014	bdl	bdl	bdl	bdl	0.023	0.042	0.019	bdl	0.033	0.014	0.028	bdl	bdl	bdl	0.038	bdl	0.033	0.023	0.023	bdl	bdl	0.014	bdl	bdl	bdl	0.023	bdl	bdl	0.028	bdl	0.023	bdl	0.023	bdl	0.028	0.023	0.023	0.038	bdl	0.023	0.042	bdl	0.047
MgO	0.005	0.043	0.017	0.007	0.017	0.04	0.043	0.043	0.02	0.023	0.055	0.049	0.052	0.057	0.035	0.013	0.051	0.042	0.031	0.06	0.087	0.172	2.544	0.096	0.101	0.385	0.074	0.117	0.081	0.062	0.021	0.022	0.028	0.055	0.04	0.042	0.027	0.047	0.063	0.013	0.029	0.146	0.043	0.044	0.019	0.054	0.047	0.034	2.487
CaO	0.0054	16.673	17.631	18.082	16.915	16.812	16.921	16.993	16.727	17.232	17.201	17.004	17.378	16.315	16.715	16.876	16.846	17.252	16.335	16.808	14.137	15.993	14.187	14.659	17.153	15.215	15.475	18.098	16.173	11.839	11.576	11.68	12.294	12.091	13.669	13.493	14.002	12.76	13.376	13.932	13.854	14.222	12.415	12.555	12.111	12.744	12.983	13.682	9.238
BaO	0.0135	0.092	0.059	0.048	0.09	0.093	0.086	0.078	0.092	0.087	0.08	0.068	0.076	0.097	0.084	0.078	0.078	0.096	0.067	0.067	0.105	0.042	0.035	0.067	0.035	0.049	0.042	bdl	0.015	0.024	0.029	bdl	0.03	bdl	bdl	0.032	bdl	bdl	bdl	bdl	bdl	bdl	0.226	0.256	0.295	0.241	0.244	0.235	0.153
Na2O	0.0042	1.749	1.377	1.201	1.773	1.731	1.755	2.044	1.647	1.69	1.666	1.704	1.637	1.881	1.777	1.679	1.705	1.504	1.861	1.885	3.243	2.325	2.408	2.985	1.775	2.507	2.4	1.041	2.291	3.974	4.316	4.462	4.056	4.274	3.272	3.289	3.317	3.824	3.702	3.243	3.357	3.234	4.203	4.146	4.313	3.776	3.905	3.479	4.986
K2O	0.0023	0.043	bdl	0.004	0.029	0.018	0.046	bdl	bdl	0.012	0.04	bdl	bdl	bdl	0.029	0.005	bdl	0.003	bdl	0.003	0.013	0.007	0.024	0.035	bdl	bdl	0.035	0.023	bdl	0.382	0.383	0.405	0.495	0.24	0.348	0.279	0.245	0.38	0.322	0.315	0.331	0.28	bdl	bdl	0.015	0.024	0.017	0.055	0.014
Total		95.809	97.232	98.972	97.52	95.612	96.818	99.374	95.253	96.664	97.613	96.023	95.651	99.602	95.81	96.933	95.844	95.843	95.721	97.405	98.686	98.544	97.818	98.626	99.376	98.414	98.091	98.166	97.973	95.365	97.455	98.688	95.653	97.246	98.388	98.086	98.788	97.944	99.257	98.921	98.539	98.945	97.041	97.495	96.769	96.904	97.11	96.369	95.421
		Cations based on 8 oxygens
Si		2.13585	2.09247	2.09408	2.15715	2.14021	2.15646	2.2309	2.12549	2.12598	2.13342	2.12569	2.10165	2.07065	2.13747	2.12654	2.13892	2.12229	2.15542	2.15116	2.32767	2.21599	2.18675	2.29159	2.15692	2.26944	2.25614	2.10867	2.20849	2.38087	2.39368	2.45422	2.4356	2.3968	2.33387	2.33197	2.32097	2.376	2.34463	2.321	2.3286	2.31022	2.37492	2.37859	2.38977	2.35666	2.338	2.32048	2.43009
Ti		0.00118954	7.1161e-05	0	0.000992425	0	0	0.00125229	0.00108849	0.00182371	0.000460337	0	0.00144452	0	0	0.00128307	0	0.000433236	0.000649104	0.000354366	6.95812e-05	0.0018528	0	0.00229948	0	0.000804865	0.000632652	0	0.0019339	0.000286085	0.00111911	0.00107131	0.000643062	0.00238297	0	0.000524146	0.00170037	0.0031062	0	0.00225289	0.00170437	0	0.00249754	0.000805851	0	0.00339012	0.00214684	0	0.00244471
Al		1.82203	1.86929	1.87345	1.80517	1.80676	1.80042	1.72826	1.83439	1.81714	1.82168	1.81962	1.83105	1.93819	1.81639	1.84336	1.81359	1.82811	1.81249	1.80664	1.65593	1.74879	1.66269	1.68534	1.80762	1.69776	1.72562	1.86372	1.7551	1.61019	1.59201	1.53059	1.51757	1.58186	1.6588	1.66822	1.65821	1.60457	1.63048	1.66953	1.64533	1.65513	1.60263	1.60248	1.59549	1.63799	1.63795	1.65088	1.40342
Cr		0	0	0	0	0.000760094	0	0	0.000991821	0	0	0	0	0	0.000265264	0	0.00151638	0.000759151	0	0.000968679	0.00146311	0	0	0.00168499	0.000731135	0.00389992	0.00587549	0.00148544	0.00243989	0.00101513	0.000992754	0.000981005	0.000262926	0	0	0	0.000255388	0	0	0	0	0	0.00122046	0.00121561	0.000963788	0.00122521	0.000962048	0	0.000484258
Fe3		0	0	0	0	0	0	0	0	0	0	0	0	0	0	0	0	0	0	0	0	0	0	0	0	0	0	0	0	0	0	0	0	0	0	0	0	0	0	0	0	0	0	0	0	0	0	0	0
Fe2		0.0146717	0.0157877	0.0203276	0.0158847	0.0188133	0.0135351	0.00970979	0.0160995	0.0173383	0.0158698	0.0184463	0.0133735	0.0148691	0.0151915	0.014348	0.0157988	0.0160196	0.0156803	0.0144234	0.0130772	0.0138012	0.0470865	0.012476	0.0173618	0.0157222	0.0109442	0.0102129	0.00821155	0.00966378	0.0215461	0.014335	0.0140246	0.0110289	0.0105381	0.0111915	0.012542	0.0117991	0.0154031	0.0100216	0.0141188	0.0162609	0.00727616	0.00642904	0.0054893	0.00518385	0.00516628	0.00668147	0.0615453
Mn		0	0	0	0	0.000570001	0.000201004	0	0	0	0.000917329	0.00170211	0.000772829	0	0.00133969	0.000562007	0.00113715	0	0	0	0.00148905	0.000354372	0.00129956	0.000902565	0.000900753	0	0.000356287	0.000556972	0	0.000362504	0	0.000895253	0	0	0.0010987	0	0.00089896	0	0.000892562	0	0.00109696	0.000897616	0.00091127	0.0014996	0.000198559	0.000914821	0.00166488	0	0.0018756
Mg		0.00307271	0.00119908	0.000485922	0.00119447	0.00286636	0.00304247	0.00296522	0.00143854	0.00163043	0.00386085	0.00349509	0.00372268	0.00390393	0.00250081	0.000918501	0.00364545	0.00300594	0.00221611	0.00421494	0.00600024	0.0119198	0.176328	0.00663048	0.00696181	0.0267082	0.00515599	0.00819245	0.00564604	0.00439526	0.0014559	0.00150717	0.00198301	0.00382085	0.00276251	0.00290936	0.00185737	0.00325181	0.00430303	0.000893219	0.00199965	0.0100286	0.00299854	0.0030561	0.00132799	0.00378029	0.0032791	0.00239616	0.17468
Ca		0.85628	0.89377	0.90212	0.854178	0.865843	0.860466	0.842185	0.864689	0.877927	0.867807	0.87169	0.894132	0.803088	0.858358	0.856949	0.86542	0.887401	0.839262	0.848604	0.700738	0.796561	0.706716	0.727658	0.849747	0.758585	0.774925	0.910768	0.810211	0.603194	0.576791	0.575086	0.625763	0.603683	0.678469	0.671748	0.692268	0.634493	0.656612	0.687982	0.686564	0.702094	0.622211	0.62673	0.608374	0.641189	0.651	0.693005	0.46633
Ba		0.0017281	0.0010939	0.000875864	0.00166225	0.00175178	0.0015995	0.00141387	0.00173943	0.00162114	0.00147617	0.00127496	0.00143019	0.00174633	0.00157768	0.00144863	0.00146556	0.00180605	0.00125902	0.00123721	0.00190356	0.000765097	0.000637676	0.0012164	0.000634155	0.000893524	0.00076923	0.00022087	0.000274838	0.00044723	0.000528489	0	0.000558491	0	0	0.000582674	0.000108496	0.000181867	0	0	0	0	0.00414264	0.00467392	0.00541989	0.00443481	0.0044748	0.00435344	0.00282478
Na		0.162548	0.12632	0.10843	0.162022	0.161327	0.161501	0.183319	0.154072	0.155811	0.152102	0.158077	0.152419	0.167554	0.165135	0.154286	0.158505	0.139997	0.173027	0.172222	0.290894	0.209557	0.21707	0.268137	0.159125	0.226191	0.217485	0.0948019	0.207693	0.366403	0.389162	0.397565	0.373598	0.386163	0.293897	0.296313	0.296769	0.344099	0.328858	0.289801	0.301055	0.288911	0.381188	0.374526	0.392066	0.343796	0.354337	0.318882	0.455467
K		0.00262949	0	0.000237618	0.00174371	0.00110381	0.00278526	0	0	0.000727956	0.00240287	0	0	0	0.00177321	0.000302313	0	0.00018374	0	0.000180348	0.000767261	0.000415134	0.00142353	0.00206867	0	0	0.00208688	0.00137818	0	0.0231743	0.0227227	0.0237435	0.0300001	0.0142679	0.0205671	0.0165388	0.0144229	0.0224989	0.0188209	0.0185214	0.0195315	0.0164586	0	0	0.000897186	0.00143778	0.00101498	0.00331704	0.000841481
		5	5	5	5	5	5	5	5	5	5	5	5	5	5	5	5	5	5	5	5	5	5	5	5	5	5	5	5	5	5	5	5	5	5	5	5	5	5	5	5	5	5	5	5	5	5	5	5
tot. oxy.		7.96546	7.96402	7.97647	7.97885	7.96275	7.97452	8.00462	7.96724	7.95811	7.96747	7.95646	7.94241	7.95597	7.96234	7.97221	7.96722	7.96706	7.9758	7.96911	8.0106	7.98725	7.90885	8.0023	7.98153	8.00798	8.01274	7.99318	7.98535	7.99197	7.98535	8.01043	7.99336	7.98989	8.00604	8.01018	7.9963	7.99809	7.98603	8.00385	7.99268	7.9851	7.98875	7.99398	7.99152	8.00704	7.98193	7.98482	7.90633
An		83.8293	87.6168	89.2492	83.9121	84.2036	83.9682	82.124	84.8765	84.8676	84.8868	84.6492	85.436	82.7378	83.7205	84.7175	84.5198	86.3582	82.9073	83.1144	70.6105	79.1391	76.3844	72.9216	84.2275	77.0312	77.9213	90.4484	79.596	60.7586	58.3397	57.7167	60.7914	60.121	68.3297	68.2255	68.9881	63.3802	65.3807	69.0534	68.1689	69.6893	62.0103	62.5944	60.7562	65.0014	64.6891	68.2626	50.5431
Ab		15.9133	12.3832	10.7273	15.9166	15.6891	15.76	17.876	15.1235	15.062	14.8782	15.3508	14.564	17.2622	16.1065	15.2526	15.4802	13.6239	17.0927	16.8679	29.3122	20.8196	23.4617	26.8711	15.7725	22.9688	21.8689	9.41478	20.404	36.9071	39.362	39.9004	36.2941	38.4581	29.5989	30.0948	29.5746	34.3724	32.7453	29.0876	29.8918	28.6771	37.9897	37.4056	39.1543	34.8528	35.21	31.4107	49.3657
Or		0.257425	0	0.0235082	0.171298	0.107346	0.271799	0	0	0.0703702	0.235043	0	0	0	0.172952	0.0298865	0	0.0178808	0	0.0176637	0.0773137	0.0412439	0.15386	0.20731	0	0	0.209843	0.136867	0	2.3343	2.29829	2.38295	2.91444	1.42094	2.07135	1.67974	1.43731	2.24744	1.87404	1.85902	1.93928	1.63367	0	0	0.0895988	0.145757	0.100857	0.326736	0.0912038
M.D.L. - minimum detection limit
bdl - below detection limit
[truncated: 71 more columns]

## Sheet: AmpApp
Fe-Mg-Mn amphibole analyses
Point		43	44	45	46	21	24	25	27	28	30	34	70	71	5	6	7	8	11	38	40	41	42	44	45	46	47	48	49	51	52	53	54	55	57	59	80	81	87	88	90	91	96	97	100	101	102	103	104
Comment	M.D.L.	Webb01a P43	Webb01a P44	Webb01a P45	Webb01a P46	Webb01a P21	Webb01a P24	Webb01a P25	Webb01a P27	Webb01a P28	Webb01a P30	Webb01a P34	Webb01a P70	Webb01a P71	Webb02a P5	Webb02a P6	Webb02a P7	Webb02a P8	Webb02a P11	Webb02a P38	Webb02a P40	Webb02a P41	Webb02a P42	Webb02a P44	Webb02a P45	Webb02a P46	Webb02a P47	Webb02a P48	Webb02a P49	Webb02a P51	Webb02a P52	Webb02a P53	Webb02a P54	Webb02a P55	Webb02a P57	Webb02a P59	Webb02a P80	Webb02a P81	Webb02a P87	Webb02a P88	Webb02a P90	Webb02a P91	Webb02a P96	Webb02a P97	Webb02a P100	Webb02a P101	Webb02a P102	Webb02a P103	Webb02a P104
Depth (m)		-0.2	-0.2	-0.2	-0.2	-0.2	-0.2	-0.2	-0.2	-0.2	-0.2	-0.2	-0.2	-0.2	-0.2	-0.2	-0.2	-0.2	-0.2	-0.2	-0.2	-0.2	-0.2	-0.2	-0.2	-0.2	-0.2	-0.2	-0.2	-0.2	-0.2	-0.2	-0.2	-0.2	-0.2	-0.2	-0.2	-0.2	-0.2	-0.2	-0.2	-0.2	-0.2	-0.2	-0.2	-0.2	-0.2	-0.2	-0.2
SiO2	0.0055	57.017	58.658	53.529	56.805	57.803	60.845	57.586	54.255	53.685	54.107	59.723	36.963	39.627	56.422	56.136	54.929	57.714	55.403	56.246	55.334	55.811	53.585	53.001	54.892	55.857	58.391	56.996	60.59	59.857	44.093	46.51	56.063	52.332	61.505	60.09	57.362	56.208	54.08	56.771	57.43	57.148	57.579	57.521	55.564	55.59	54.094	55.296	54.726
TiO2	0.007	0.113	0.087	0.19	0.121	0.213	0.099	0.037	0.087	0.116	0.035	0.029	0.208	0.035	0.062	bdl	0.093	0.014	0.036	0.065	bdl	0.021	0.25	0.043	0.063	0.062	bdl	bdl	0.011	0.061	0.016	bdl	0.008	0.038	bdl	0.142	0.01	bdl	0.137	0.089	0.021	0.014	bdl	bdl	bdl	0.013	0.258	0.068	0.027
Al2O3	0.0055	1.584	1.538	1.293	2.011	1.254	1.473	1.211	1.3	1.338	1.152	0.425	13.568	13.631	1.931	0.861	1.167	0.594	0.972	0.857	1.088	1.147	1.487	1.414	1.223	1.04	0.953	1.859	0.582	0.303	6.061	4.74	0.799	2.363	0.325	0.162	0.474	0.723	1.314	0.903	0.652	0.579	0.584	0.555	1.151	1	1.58	1.227	1.447
FeO	0.0141	5.593	6.095	13.379	5.832	9.626	5.3	6.597	11.939	12.778	12.823	7.454	11.557	12.283	6.542	10.734	10.751	10.558	10.799	11.114	10.401	10.985	10.256	11.291	10.145	10.048	9.628	3.248	2.433	2.028	12.234	12.988	11.065	11.394	1.948	4.477	10.56	10.751	10.092	10.655	9.687	9.793	10.552	11.11	9.681	10.036	9.736	10.131	9.794
MnO	0.0119	bdl	0.083	0.343	0.097	0.032	0.037	0.097	0.239	0.303	0.234	0.028	0.091	0.041	0.051	0.055	0.12	0.148	0.18	0.143	0.161	0.078	0.189	0.203	0.166	0.092	0.102	bdl	0.014	0.037	0.087	0.124	0.18	0.189	0.037	0.135	0.115	0.088	0.166	0.138	0.12	0.111	0.101	0.143	0.12	0.157	0.115	0.115	0.106
MgO	0.005	27.879	26.421	26.941	26.376	23.344	27.865	25.398	27.944	28.073	25.183	23.758	22.112	21.998	27.31	25.188	25.009	24.307	24.508	22.834	24.462	23.893	25.503	25.496	24.728	24.2	24.558	30.101	29.932	28.937	25.555	24.117	23.411	24.084	29.94	26.406	23.726	24.085	22.781	23.679	24.104	24.414	23.878	23.421	23.933	24.336	25.579	24.118	24.463
CaO	0.0054	0.118	0.068	1.924	0.107	0.09	0.058	0.135	1.787	1.626	1.124	0.035	0.187	0.153	0.139	0.155	0.549	0.103	0.307	1.565	0.491	0.452	0.189	0.168	1.425	0.217	0.647	0.019	0.082	0.382	0.795	0.544	0.654	1.821	0.062	5.562	0.275	0.525	5.121	0.615	0.274	0.68	0.082	0.19	1.949	1.193	0.109	1.143	2.114
Na2O	0.0042	0.301	0.669	0.007	0.51	0.203	0.536	0.305	bdl	0.028	0.01	0.039	0.007	0.087	0.09	0.049	0.036	0.062	0.028	0.064	0.061	0.074	0.111	0.052	0.049	0.011	0.076	0.06	0.087	0.122	0.069	0.069	0.049	0.114	0.123	0.064	0.042	0.055	0.083	0.043	0.045	0.083	0.029	0.022	0.092	0.091	0.064	0.068	0.128
K2O	0.0023	0.017	0.01	bdl	0.029	0.039	0.011	0.047	0.006	0.008	bdl	0.011	5.315	5.914	0.037	0.004	0.004	0.007	0.011	0.008	0.015	0.023	0.04	0.031	0.012	0.016	0.005	0.01	0.008	0.012	0.019	0.009	0.013	0.024	0.004	0.004	0.005	0.011	0.024	0.01	0.009	bdl	0.007	0.007	0.024	0.013	0.038	0.02	0.033
BaO	0.0135	bdl	bdl	bdl	bdl	bdl	bdl	0.019	bdl	bdl	bdl	bdl	bdl	0.022	bdl	bdl	bdl	bdl	bdl	0.021	0.022	bdl	bdl	bdl	bdl	bdl	bdl	bdl	bdl	bdl	bdl	bdl	0.015	bdl	bdl	bdl	bdl	bdl	bdl	bdl	bdl	bdl	bdl	bdl	bdl	bdl	bdl	bdl	bdl
Cr2O3	0.0086	0.301	0.379	0.288	0.399	0.271	0.44	0.32	0.353	0.365	0.352	bdl	bdl	0.071	0.381	0.362	0.375	0.421	0.427	0.194	0.349	0.446	0.33	0.354	0.337	0.188	0.221	0.425	0.073	0.107	0.327	0.269	0.149	0.523	0.047	0.08	0.155	0.213	0.456	0.459	0.35	0.195	0.129	0.058	0.383	0.292	0.499	0.356	0.52
Total		92.923	94.008	97.894	92.287	92.875	96.664	91.752	97.91	98.32	95.02	91.502	90.014	93.862	92.971	93.544	93.033	93.928	92.681	93.111	92.384	92.93	91.948	92.061	93.04	91.731	94.581	92.724	93.812	91.846	89.256	89.374	92.406	92.887	93.997	97.122	92.724	92.659	94.254	93.362	92.697	93.017	92.944	93.027	92.903	92.721	92.08	92.555	93.358
Cations based on 23 oxygens
Si		7.99489	8.13231	7.35782	8.02884	8.22384	8.15724	8.1916	7.40574	7.3092	7.6975	8.47928	5.77418	6.00171	7.94715	8.01882	7.92047	8.17558	8.00566	8.10853	8.0088	8.0403	7.81712	7.73491	7.91492	8.09626	8.17665	7.92251	8.2383	8.29999	6.59557	6.98968	8.12017	7.6136	8.31484	8.12876	8.22534	8.10319	7.79098	8.11766	8.20733	8.16095	8.22703	8.23525	8.00258	8.01643	7.84767	7.99285	7.8754
Al iv		0.00511222	0	0.209468	0	0	0	0	0.209138	0.214701	0.193156	0	2.22582	1.99829	0.0528473	0	0.0795251	0	0	0	0	0	0.182881	0.24321	0.0850754	0	0	0.0774855	0	0	1.06853	0.839556	0	0.386405	0	0	0	0	0.209023	0	0	0	0	0	0	0	0.152333	0.00714639	0.124596
Al vi		0.25666	0.251306	0	0.334995	0.210272	0.232746	0.203028	0	0	0	0.0711159	0.272223	0.434873	0.26771	0.144955	0.118801	0.0991709	0.165535	0.14561	0.185594	0.194749	0.072786	0	0.122762	0.177664	0.157283	0.227064	0.0932653	0.0495183	0	0	0.136394	0.0187739	0.051783	0.0258284	0.0801065	0.122845	0.014083	0.152178	0.109817	0.0974492	0.0983449	0.0936491	0.195377	0.169959	0.117819	0.201886	0.120823
Ti		0.0119183	0.00907267	0.0196446	0.0128642	0.0227947	0.00998351	0.00395898	0.00893259	0.0118797	0.00374536	0.00309703	0.0244408	0.00398732	0.00656877	0	0.010087	0.00149175	0.00391287	0.00704845	0	0.00227563	0.027433	0.0047203	0.00683294	0.00675971	0	0.000627335	0.00112502	0.00636241	0.00180025	0	0.000871582	0.00415849	0.000610132	0.0144491	0.0010786	0	0.0148459	0.00957246	0.00225742	0.00150382	0	0	0.000650006	0.00141012	0.028154	0.00739344	0.00292262
Cr		0.0333695	0.0415433	0.0312988	0.0445876	0.0304838	0.0466387	0.0359896	0.038096	0.0392903	0.0395926	0	0.000741054	0.00850193	0.0424291	0.040884	0.042752	0.0471514	0.0487828	0.022112	0.0399371	0.0507999	0.0380621	0.040846	0.0384187	0.0215447	0.0244679	0.0467071	0.00784757	0.0117306	0.0386728	0.0319623	0.0170628	0.0601589	0.00502362	0.00855633	0.0175726	0.024278	0.0519392	0.051891	0.0395463	0.0220166	0.0145728	0.00656529	0.0436125	0.0332922	0.0572358	0.0406849	0.0591641
Fe3+		0	0	1.00244	0	0	0	0	0.92237	1.09507	0.361995	0	0.842634	0.376106	0	0	0	0	0	0	0	0	0	0.215282	0	0	0	0	0	0	1.53041	1.12683	0	0.261973	0	0	0	0	0.085714	0	0	0	0	0	0	0	0	0	0
Fe2+		0.655856	0.706669	0.535497	0.68935	1.14532	0.594224	0.784791	0.440495	0.359837	1.16361	0.88504	0.667184	1.17966	0.770601	1.28229	1.29645	1.25076	1.30498	1.33991	1.25894	1.32345	1.25123	1.16275	1.22334	1.21799	1.12751	0.377564	0.276653	0.235172	0	0.505508	1.34028	1.12432	0.220236	0.506484	1.26634	1.29617	1.13016	1.27413	1.15773	1.16953	1.26087	1.33021	1.16604	1.21032	1.18121	1.22466	1.17868
Mn		0	0.00974654	0.0399337	0.0116124	0.0038562	0.00420151	0.0116872	0.027632	0.0349418	0.0281967	0.00336714	0.0120407	0.00525961	0.00608442	0.00665453	0.014656	0.0177576	0.0220304	0.0174611	0.0197373	0.00951771	0.0233534	0.025093	0.0202736	0.0112948	0.0120981	0	0.00161232	0.0043456	0.0110227	0.015784	0.0220824	0.02329	0.00423673	0.0154683	0.0139673	0.0107455	0.0202558	0.0167136	0.0145255	0.0134261	0.0122232	0.0173409	0.0146387	0.0191765	0.0141311	0.0140796	0.0129202
Mg		5.82765	5.46065	5.52055	5.55755	4.95117	5.56911	5.38592	5.68625	5.69789	5.34088	5.02847	5.14944	4.96679	5.73447	5.36378	5.37594	5.13307	5.27935	4.90728	5.27808	5.13135	5.5463	5.54692	5.31539	5.22914	5.12662	6.23747	6.0671	5.9817	5.69859	5.40309	5.05495	5.22348	6.03398	5.32517	5.0718	5.17623	4.89256	5.0475	5.13524	5.19741	5.0861	4.99878	5.13857	5.23169	5.53202	5.19706	5.24804
Ca		0.0177275	0.0101007	0.28335	0.0162035	0.0137191	0.00833113	0.0205752	0.261343	0.237189	0.171325	0.00532406	0.0312984	0.0248275	0.0209766	0.0237224	0.0848163	0.0156326	0.0475291	0.241726	0.0761403	0.0697667	0.0295408	0.0262687	0.220146	0.0336996	0.0970715	0.00282963	0.0119456	0.0567523	0.127411	0.0875926	0.10149	0.283851	0.00898034	0.806141	0.0422493	0.0810914	0.790438	0.0942187	0.0419538	0.104041	0.0125531	0.0291448	0.30075	0.184324	0.0169424	0.177016	0.325943
Na		0.0818337	0.179833	0.00186559	0.139764	0.0559987	0.139329	0.0841219	0	0.0073915	0.00275838	0.0107359	0.00212021	0.0255482	0.0245789	0.0135713	0.0100649	0.0170289	0.00784475	0.0178891	0.0171184	0.0206701	0.0313967	0.014714	0.0136991	0.00309141	0.0206348	0.0161707	0.0229358	0.0328005	0.020012	0.0201056	0.0137608	0.0321577	0.0322408	0.0167865	0.0116771	0.0153737	0.0231841	0.0119215	0.012469	0.0229813	0.00803405	0.00610704	0.0256911	0.0254439	0.0180023	0.0190579	0.0357147
K		0.00304099	0.00176866	0	0.00522905	0.0070786	0.00188135	0.0085292	0.00104481	0.00138952	0	0.00199236	1.05922	1.14268	0.00664849	0.000728933	0.000735814	0.00126501	0.00202775	0.00147129	0.00276965	0.00422706	0.00744427	0.00577154	0.00220738	0.00295859	0.000893219	0.00177328	0.00138767	0.00212277	0.00362573	0.00172549	0.0024021	0.00445443	0.000689861	0.000690305	0.000914656	0.00202306	0.00441088	0.00182416	0.00164083	0	0.00127595	0.00127852	0.00440967	0.00239159	0.00703289	0.00368805	0.00605831
Ba		0	0	0	0	0	0	0.00105911	0	0	0	0	0	0.0013057	0.000331169	0	0	0	0.000566238	0.00118633	0.00124777	0	0.000457329	0.000457506	0	0	0	0	0	0	0	0.000235563	0.000851364	0.000285055	0	0	0	0	0	0	0.000280007	0	0.000167971	0	0	0	0.000454796	0.000736355	0
Total		14.8881	14.803	15.0019	14.841	14.6645	14.7637	14.7313	15.001	15.0088	15.0028	14.4884	16.0613	16.1695	14.8804	14.8954	14.9543	14.7589	14.8882	14.8102	14.8884	14.8471	15.028	15.0209	14.9631	14.8004	14.7432	14.9102	14.7222	14.6805	15.0956	15.0221	14.8103	15.0369	14.6726	14.8483	14.731	14.8319	15.0276	14.7776	14.7228	14.7893	14.7212	14.7183	14.8923	14.8944	14.973	14.8863	14.9903
Amphibole group		Fe-Mg-Mn	Fe-Mg-Mn	Fe-Mg-Mn	Fe-Mg-Mn	Fe-Mg-Mn	Fe-Mg-Mn	Fe-Mg-Mn	Fe-Mg-Mn	Fe-Mg-Mn	Fe-Mg-Mn	Fe-Mg-Mn	Fe-Mg-Mn	Fe-Mg-Mn	Fe-Mg-Mn	Fe-Mg-Mn	Fe-Mg-Mn	Fe-Mg-Mn	Fe-Mg-Mn	Fe-Mg-Mn	Fe-Mg-Mn	Fe-Mg-Mn	Fe-Mg-Mn	Fe-Mg-Mn	Fe-Mg-Mn	Fe-Mg-Mn	Fe-Mg-Mn	Fe-Mg-Mn	Fe-Mg-Mn	Fe-Mg-Mn	Fe-Mg-Mn	Fe-Mg-Mn	Fe-Mg-Mn	Fe-Mg-Mn	Fe-Mg-Mn	Fe-Mg-Mn	Fe-Mg-Mn	Fe-Mg-Mn	Fe-Mg-Mn	Fe-Mg-Mn	Fe-Mg-Mn	Fe-Mg-Mn	Fe-Mg-Mn	Fe-Mg-Mn	Fe-Mg-Mn	Fe-Mg-Mn	Fe-Mg-Mn	Fe-Mg-Mn	Fe-Mg-Mn
(Ca+Na) (B)		0.0995612	0.189934	0.283371	0.155967	0.0697177	0.14766	0.104697	0.261343	0.237247	0.171393	0.01606	0.0334186	0.0503757	0.0455556	0.0372937	0.0948812	0.0326615	0.0553739	0.259615	0.0932587	0.0904368	0.0416666	0.0266314	0.233845	0.036791	0.117706	0.0190003	0.0348814	0.0895528	0.127411	0.0878111	0.115251	0.284618	0.0412212	0.822927	0.0539265	0.0964651	0.790438	0.10614	0.0544228	0.127023	0.0205871	0.0352519	0.326441	0.209768	0.0349448	0.196074	0.361658
Na (B)		0.0818337	0.179833	2.14678e-05	0.139764	0.0559987	0.139329	0.0841219	0	5.73715e-05	6.80541e-05	0.0107359	0.00212021	0.0255482	0.0245789	0.0135713	0.0100649	0.0170289	0.00784475	0.0178891	0.0171184	0.0206701	0.0121257	0.00036276	0.0136991	0.00309141	0.0206348	0.0161707	0.0229358	0.0328005	0	0.000218545	0.0137608	0.000767237	0.0322408	0.0167865	0.0116771	0.0153737	1.45717e-16	0.0119215	0.012469	0.0229813	0.00803405	0.00610704	0.0256911	0.0254439	0.0180023	0.0190579	0.0357147
(Na+K) (A)		0.00304099	0.00176866	0.00184412	0.00522905	0.0070786	0.00188135	0.0085292	0.00104481	0.00872365	0.00269033	0.00199236	1.05922	1.14268	0.00664849	0.000728933	0.000735814	0.00126501	0.00202775	0.00147129	0.00276965	0.00422706	0.0267153	0.0201228	0.00220738	0.00295859	0.000893219	0.00177328	0.00138767	0.00212277	0.0236377	0.0216126	0.0024021	0.0358449	0.000689861	0.000690305	0.000914656	0.00202306	0.027595	0.00182416	0.00164083	0	0.00127595	0.00127852	0.00440967	0.00239159	0.00703289	0.00368805	0.00605831
Mg/(Mg+Fe2)		0.898842	0.885417	0.911576	0.889649	0.812135	0.903587	0.87282	0.928103	0.940599	0.821106	0.850336	0.885297	0.808075	0.881538	0.80706	0.8057	0.804073	0.801805	0.785518	0.807413	0.794966	0.815929	0.826705	0.812909	0.811081	0.819717	0.942923	0.95639	0.962172	1	0.914445	0.790425	0.82288	0.964786	0.913149	0.800204	0.799738	0.812351	0.798449	0.816028	0.816312	0.801343	0.789823	0.81505	0.812121	0.824047	0.809294	0.816597
													potassium-	potassium-																						calcian-			calcian-
Amphibole names		anthophyllite	anthophyllite	magnesio-anthophyllite	anthophyllite	anthophyllite	magnesio-anthophyllite	anthophyllite	magnesio-anthophyllite	magnesio-anthophyllite	anthophyllite	anthophyllite	gedrite	gedrite	anthophyllite	anthophyllite	anthophyllite	anthophyllite	anthophyllite	anthophyllite	anthophyllite	anthophyllite	anthophyllite	anthophyllite	anthophyllite	anthophyllite	anthophyllite	magnesio-anthophyllite	magnesio-anthophyllite	magnesio-anthophyllite	magnesio-gedrite	magnesio-gedrite	anthophyllite	anthophyllite	magnesio-anthophyllite	magnesio-anthophyllite	anthophyllite	anthophyllite	anthophyllite	anthophyllite	anthophyllite	anthophyllite	anthophyllite	anthophyllite	anthophyllite	anthophyllite	anthophyllite	anthophyllite	anthophyllite
		0.113	0.087	0.19	0.121	0.213	0.099	0.037	0.087	0.116	0.035	0.029	0.208	0.035	0.062	bdl	0.093	0.014	0.036	0.065	bdl	0.021	0.25	0.043	0.063	0.062	bdl	bdl	0.011	0.061	0.016	bdl	0.008	0.038	bdl	0.142	0.01	bdl	0.137	0.089	0.021	0.014	bdl	bdl	bdl	0.013	0.258	0.068	0.027
M.D.L. - minimum detection limit
bdl - below detection limit
[truncated: 215 more columns]

## Sheet: ChlApp
Point		Chl 77	74	75	76	77	105	106	107	108	63	64	69	130	78	79	82	110	117	119	120	125	128	Chl 19	117	119	120	125	128	Chl 19	67	48	49	52	53	54	56	67	48	49	52	53	54	56	63	Chl 7	78	79	48
Comment	M.D.L.	CR01 P77	Webb01a P74	Webb01a P75	Webb01a P76	Webb01a P77	Webb01a P105	Webb01a P106	Webb01a P107	Webb01a P108	Webb01a P63	Webb01a P64	Webb01a P69	Webb01a P130	Webb02a P78	Webb02a P79	Webb02a P82	Webb02a P110	Webb01 P117	Webb01 P119	Webb01 P120	Webb01 P125	Webb01 P128	Webb01 P19	Webb01 P117	Webb01 P119	Webb01 P120	Webb01 P125	Webb01 P128	Webb01 P19	Webb02 P67	Webb02 P48	Webb02 P49	Webb02 P52	Webb02 P53	Webb02 P54	Webb02 P56	Webb02 P67	Webb02 P48	Webb02 P49	Webb02 P52	Webb02 P53	Webb02 P54	Webb02 P56	PXHFW01 P63	BMSZ01 P7	BMSZ01 P78	BMSZ01 P79	IRUP01 P48
SiO2	0.0055	42.663	31.513	37.431	34.11	38.729	29.4	28.112	29.4	29.122	33.277	32.037	32.866	29.825	32.758	32.696	32.977	34.269	33.05	34.353	33.619	33.099	34.238	35.412	33.05	34.353	33.619	33.099	34.238	35.412	30.955	29.439	29.268	32.847	31.093	29.491	30.616	30.955	29.439	29.268	32.847	31.093	29.491	30.616	33.135	36.214	30.525	29.502	33.773
TiO2	0.007	0.053	0.19	0.149	0.192	0.266	0.05	0.068	0.077	bdl	0.1	0.101	0.058	0.12	0.058	0.009	bdl	0.044	bdl	bdl	bdl	0.042	bdl	0.706	bdl	bdl	bdl	0.042	bdl	0.706	0.09	bdl	0.025	0.052	0.056	bdl	0.042	0.09	bdl	0.025	0.052	0.056	bdl	0.042	bdl	0.183	0.063	0.139	0.304
Al2O3	0.0055	8.273	11.848	10.95	14.052	12.313	17.72	17.272	18.409	17.513	12.888	12.054	13.673	15.445	10.692	10.619	10.657	10.13	11.317	10.698	11.056	11.083	11.412	10.71	11.317	10.698	11.056	11.083	11.412	10.71	15.795	17.204	16.852	14.194	16.779	16.742	17.954	15.795	17.204	16.852	14.194	16.779	16.742	17.954	11.009	12.267	15.981	15.877	9.405
FeO	0.0141	7.991	14.761	11.528	11.973	10.732	16.04	16.105	15.798	15.822	15.573	15.601	12.923	18.296	13.891	14.951	14.94	15.018	17.055	15.716	17.385	14.285	13.292	13.378	17.055	15.716	17.385	14.285	13.292	13.378	15.501	15.771	15.726	12.932	14.46	15.625	14.279	15.501	15.771	15.726	12.932	14.46	15.625	14.279	19.895	10.575	9.613	10.336	15.367
MnO	0.0119	0.102	0.095	0.128	0.082	0.041	0.2	0.154	0.159	0.091	0.191	0.191	0.205	0.181	0.146	0.087	0.096	0.133	0.1	0.237	0.195	0.119	0.169	0.091	0.1	0.237	0.195	0.119	0.169	0.091	0.146	0.205	0.228	0.16	0.169	0.278	0.105	0.146	0.205	0.228	0.16	0.169	0.278	0.105	0.082	0.064	0.023	0.101	0.037
MgO	0.005	26.193	22.21	21.689	24.263	22.357	21.458	20.618	21.817	20.593	20.388	20.316	23.214	20.505	26.543	26.378	25.794	26.233	23.342	24.427	23.58	25.594	26.424	25.258	23.342	24.427	23.58	25.594	26.424	25.258	23.101	22.323	22.359	23.836	22.579	21.62	22.294	23.101	22.323	22.359	23.836	22.579	21.62	22.294	21.647	25.84	27.077	26.604	13.755
CaO	0.0054	0.31	0.174	0.113	0.171	0.554	0.078	0.115	0.086	0.077	0.317	0.36	0.274	0.146	0.143	0.095	0.076	0.133	0.211	0.271	0.202	0.216	0.171	0.819	0.211	0.271	0.202	0.216	0.171	0.819	0.09	0.071	0.058	0.107	0.006	bdl	0.117	0.09	0.071	0.058	0.107	0.006	bdl	0.117	0.417	0.204	0.054	0.037	0.206
Na2O	0.0042	0.093	0.072	0.086	0.066	0.337	0.04	0.078	0.058	0.04	0.059	0.101	0.124	0.057	bdl	bdl	bdl	0.013	0.014	0.024	0.011	0.022	0.009	bdl	0.014	0.024	0.011	0.022	0.009	bdl	0.009	0.054	0.031	0.036	bdl	bdl	0.063	0.009	0.054	0.031	0.036	bdl	bdl	0.063	0.114	0.154	bdl	0.016	0.047
K2O	0.0023	0.029	2.397	1.911	0.575	1.587	0.443	0.367	0.352	0.258	2.045	1.321	0.103	1.398	0.009	bdl	0.012	0.026	0.013	0.007	0.009	0.011	0.01	0.005	0.013	0.007	0.009	0.011	0.01	0.005	bdl	0.027	0.014	0.101	0.152	0.034	0.3	bdl	0.027	0.014	0.101	0.152	0.034	0.3	0.01	0.489	0.023	0.04	0.034
BaO	0.0135	bdl	bdl	bdl	bdl	0.014	bdl	bdl	bdl	0.014	bdl	bdl	bdl	bdl	bdl	bdl	bdl	0.029	bdl	bdl	bdl	bdl	bdl	bdl	bdl	bdl	bdl	bdl	bdl	bdl	bdl	bdl	bdl	bdl	bdl	bdl	bdl	bdl	bdl	bdl	bdl	bdl	bdl	bdl	0.035	bdl	bdl	bdl	4.809
Cr2O3	0.0086	1.132	bdl	bdl	bdl	0.038	0.037	0.031	0.1	bdl	bdl	0.138	bdl	bdl	0.297	0.536	0.592	0.594	0.299	0.307	0.337	0.839	0.621	0.095	0.299	0.307	0.337	0.839	0.621	0.095	0.019	bdl	bdl	0.038	bdl	0.038	bdl	0.019	bdl	bdl	0.038	bdl	0.038	bdl	bdl	0.257	1.714	2.054	0.273
Total		86.85	83.266	83.996	85.484	86.968	85.466	82.92	86.258	83.53	84.838	82.22	83.44	85.979	84.54	85.375	85.146	86.622	85.412	86.045	86.401	85.31	86.348	86.478	85.412	86.045	86.401	85.31	86.348	86.478	85.706	85.1	84.561	84.303	85.294	83.828	85.77	85.706	85.1	84.561	84.303	85.294	83.828	85.77	86.344	86.247	85.073	84.706	78.01
Formula based on 36 oxygens inc. Fe2/Fe3
Si		7.93139	6.59773	7.43857	6.74154	7.36921	6.01434	5.95455	5.94583	6.07353	6.81746	6.79665	6.70737	6.16281	6.72127	6.68908	6.74716	6.87515	6.78539	6.93286	6.83078	6.73002	6.80777	6.99343	6.78539	6.93286	6.83078	6.73002	6.80777	6.99343	6.2745	6.04	6.04944	6.63412	6.27282	6.12983	6.14031	6.2745	6.04	6.04944	6.63412	6.27282	6.12983	6.14031	6.83034	7.01884	6.09283	5.9705	7.67825
Ti		0.00741018	0.0299167	0.0222689	0.0285387	0.0380646	0.00769248	0.0108323	0.0117115	0	0.0154076	0.0161146	0.00890203	0.0186481	0.00894989	0.00138474	0.000307748	0.00663879	0	0	0	0.00642254	0.000299076	0.104858	0	0	0	0.00642254	0.000299076	0.104858	0.0137198	0	0.00388613	0.00789853	0.00849657	0	0.006335	0.0137198	0	0.00388613	0.00789853	0.00849657	0	0.006335	0	0.0266744	0.00945712	0.0211558	0.0519783
Al		1.81285	2.92383	2.56492	3.27354	2.76154	4.27274	4.31223	4.38832	4.30509	3.11219	3.01423	3.28906	3.76174	2.5858	2.56069	2.57008	2.39548	2.73865	2.5448	2.6478	2.6562	2.67461	2.49305	2.73865	2.5448	2.6478	2.6562	2.67461	2.49305	3.77373	4.1605	4.10559	3.37905	3.98996	4.10174	4.24429	3.77373	4.1605	4.10559	3.37905	3.98996	4.10174	4.24429	2.67489	2.8024	3.75984	3.7873	2.52031
Cr		0.166392	0.000993218	0	0	0.00571685	0.00598454	0.00519167	0.0159902	0	0	0.0231479	0	0.000980254	0.0481814	0.0867012	0.095768	0.0942227	0.0485359	0.0489863	0.0541382	0.134881	0.0976285	0.0148338	0.0485359	0.0489863	0.0541382	0.134881	0.0976285	0.0148338	0.00304502	0.000973315	0	0.0060682	0	0.00624498	0	0.00304502	0.000973315	0	0.0060682	0	0.00624498	0	0	0.0393832	0.270497	0.328661	0.0490731
Fe3+		1.06632	0	0.651538	0.403719	0.710425	0.133521	0.0901126	0.139002	0.228417	0.221363	0.220445	0.38932	0	0.0541042	0.0159161	0.0924907	0.142863	0.205075	0.263381	0.20926	0.149186	0.224053	0.409778	0.205075	0.263381	0.20926	0.149186	0.224053	0.409778	0.204569	0.12896	0.117094	0.373619	0.306044	0.210701	0.271403	0.204569	0.12896	0.117094	0.373619	0.306044	0.210701	0.271403	0.17567	0.469654	0.134588	0.0509864	1.17133
Fe2+		0.176115	2.7005	1.26443	1.57533	0.997389	2.61071	2.76283	2.53304	2.53125	2.44688	2.54759	1.81637	3.2216	2.32955	2.54218	2.46395	2.37695	2.72333	2.38918	2.74491	2.27998	1.9863	1.79979	2.72333	2.38918	2.74491	2.27998	1.9863	1.79979	2.42318	2.57717	2.60132	1.81076	2.1337	2.50545	2.12365	2.42318	2.57717	2.60132	1.81076	2.1337	2.50545	2.12365	3.25418	1.24448	1.47013	1.6984	1.75051
Mn		0.0160623	0.0168476	0.0215466	0.0137278	0.00660814	0.0346563	0.0276305	0.0272379	0.0160758	0.0331454	0.0343232	0.0354381	0.0316802	0.0253745	0.0150765	0.0166377	0.0226018	0.0173906	0.0405142	0.0335607	0.0204956	0.0284639	0.0152227	0.0173906	0.0405142	0.0335607	0.0204956	0.0284639	0.0152227	0.0250676	0.0356269	0.0399179	0.0273727	0.02888	0.0489457	0.0178378	0.0250676	0.0356269	0.0399179	0.0273727	0.02888	0.0489457	0.0178378	0.0143179	0.010507	0.00388868	0.0173138	0.00712534
Mg		7.25892	6.93174	6.4252	7.14844	6.34144	6.54364	6.51018	6.57733	6.40219	6.22648	6.42497	7.06228	6.31608	8.11846	8.04457	7.86716	7.84545	7.14383	7.34865	7.14198	7.75764	7.83221	7.43581	7.14383	7.34865	7.14198	7.75764	7.83221	7.43581	6.98021	6.8274	6.88912	7.17646	6.79038	6.6989	6.66529	6.98021	6.8274	6.88912	7.17646	6.79038	6.6989	6.66529	6.65185	7.4657	8.05662	8.02593	4.66168
Ca		0.0617524	0.0390344	0.0240619	0.0362133	0.112951	0.0170974	0.0261005	0.0186362	0.017207	0.0695876	0.0818352	0.059917	0.0323255	0.0314387	0.0208252	0.0166616	0.0285908	0.0464173	0.0586019	0.0439775	0.0470598	0.0364323	0.173308	0.0464173	0.0586019	0.0439775	0.0470598	0.0364323	0.173308	0.0195472	0.0156087	0.0128453	0.0231561	0.00129702	0	0.0251433	0.0195472	0.0156087	0.0128453	0.0231561	0.00129702	0	0.0251433	0.0921055	0.0423656	0.0115492	0.00802333	0.0501827
Na		0.0670488	0.0584585	0.0662776	0.0505862	0.248671	0.031733	0.0640711	0.0454887	0.0323512	0.046875	0.0830951	0.0981381	0.0456756	0	0.00238015	0	0.0101143	0.0111466	0.0187832	0.00866739	0.0173474	0.00693984	0.00306345	0.0111466	0.0187832	0.00866739	0.0173474	0.00693984	0.00306345	0.0070746	0.0429653	0.0248482	0.0281968	0	0	0.0489996	0.0070746	0.0429653	0.0248482	0.0281968	0	0	0.0489996	0.091132	0.11575	0	0.0125571	0.0414382
K		0.0137535	1.28024	0.968808	0.289911	0.770337	0.231187	0.198309	0.181605	0.137265	1.06879	0.714933	0.0536243	0.736928	0.00471081	0.000521904	0.0062634	0.0133068	0.00680873	0.00360384	0.00466495	0.00570576	0.00507243	0.00251901	0.00680873	0.00360384	0.00466495	0.00570576	0.00507243	0.00251901	0	0.0141318	0.00738192	0.0520389	0.0782281	0.0180284	0.153491	0	0.0141318	0.00738192	0.0520389	0.0782281	0.0180284	0.153491	0.00525865	0.241778	0.0117114	0.0206509	0.0197193
Ba		0.00160255	0	0.00171305	0	0.00208753	0	0	0.000316968	0.00228806	0	0	0	0	0.000482365	0	0	0.0045593	0.00176977	0.000790748	0.00111456	0	0	0	0.00176977	0.000790748	0.00111456	0	0	0	0	0	0	0	0	0	0	0	0	0	0	0	0	0	0.00565384	0	0	0	0.856776
Total		18.5796	20.5793	19.4493	19.5615	19.3644	19.9033	19.962	19.8845	19.7457	20.0582	19.9573	19.5204	20.3285	19.9283	19.9793	19.8765	19.8159	19.7283	19.6501	19.7208	19.8049	19.6998	19.4457	19.7283	19.6501	19.7208	19.8049	19.6998	19.4457	19.7246	19.8433	19.8514	19.5187	19.6098	19.7198	19.6968	19.7246	19.8433	19.8514	19.5187	19.6098	19.7198	19.6968	19.7954	19.4775	19.8211	19.9415	18.8584
		talc-chlorite	diabantite	diabantite	diabantite	diabantite	pycnochlorite	pycnochlorite	pycnochlorite	pycnochlorite	diabantite	diabantite	diabantite	pycnochlorite	diabantite	diabantite	diabantite	diabantite	diabantite	diabantite	diabantite	diabantite	diabantite	diabantite	diabantite	diabantite	diabantite	diabantite	diabantite	diabantite	diabantite	pycnochlorite	pycnochlorite	diabantite	diabantite	pycnochlorite	pycnochlorite	diabantite	pycnochlorite	pycnochlorite	diabantite	diabantite	pycnochlorite	pycnochlorite	diabantite	talc-chlorite	clinochlore	clinochlore	diabantite
FeO calc		1.13272	14.761	7.60782	9.53054	6.26765	15.2596	15.5963	14.9762	14.5124	14.281	14.3585	10.642	18.296	13.5757	14.858	14.3995	14.1665	15.8606	14.1555	16.1535	13.4077	11.9447	10.897	15.8606	14.1555	16.1535	13.4077	11.9447	10.897	14.2943	15.0194	15.0486	10.7201	12.6461	14.4129	12.6609	14.2943	15.0194	15.0486	10.7201	12.6461	14.4129	12.6609	18.876	7.67757	8.80675	10.0348	9.20655
Fe2O3 calc		7.6216	0	4.3565	2.7143	4.96123	0.867292	0.565307	0.913298	1.45534	1.43576	1.38074	2.53488	0	0.350391	0.103376	0.600681	0.946226	1.32729	1.73417	1.36853	0.974947	1.4973	2.75718	1.32729	1.73417	1.36853	0.974947	1.4973	2.75718	1.34106	0.835216	0.752778	2.45809	2.01577	1.34699	1.79816	1.34106	0.835216	0.752778	2.45809	2.01577	1.34699	1.79816	1.1324	3.21992	0.895984	0.334773	6.8461
M.D.L. - minimum detection limit
bdl - below detection limit
[truncated: 17 more columns]
